# Supplementary material for: Trigger inducible tertiary lymphoid structure formation using covalent organic frameworks for cancer immunotherapy
Source: PubMed Central journal article supplement — Nat Commun. 2025 Jan 2;16:44. doi: 10.1038/s41467-024-55430-4 (PMC11696883; doi:10.1038/s41467-024-55430-4), 2025-01-02
Supplement: 41467_2024_55430_MOESM6_ESM.pdf [file 41467_2024_55430_MOESM6_ESM.pdf]

Supplementary data 1.

The atomic coordinates of the optimized computational model of TPDA-TDTACOF-1 pore.

Supplementary data 2.

atomic coordinates of the optimized computational model of TPDA-BTCOF-1 pore.

Supplementary data 3.

The atomic coordinates of the optimized computational model of TPDA-ViBTCOF-1 pore.
